# Supplementary material
Source: PubMed Central journal article supplement (PMC4731312)
Supplement: NIHMS752988-supplement-Supplementary_Material.pdf [file NIHMS752988-supplement-Supplementary_Material.pdf]

## SUPPLEMENTARY DATA

**Table 1:** Primers used in RT-PCR.

| <b>Gene</b>   | <b>Sequence</b>                 |
|---------------|---------------------------------|
| c-Fos forward | 5' CAGCCTTTCCTACTACCATTTC 3'    |
| c-Fos reverse | 5' ATCTTATTCCTTTCCTTCG 3'       |
| Fos-b forward | 5' ACTTTGACACCTCGTCCCG 3'       |
| Fos-b reverse | 5' GCTCCTGTTTCACCACCACA 3'      |
| Fra1 forward  | 5' GTGCCAAGCATCAACGC 3'         |
| Fra1 reverse  | 5' CCGATTTCTCATCCTCCAAC 3'      |
| Fra2 forward  | 5' CAGCCCACAGTGATTACCTC 3'      |
| Fra2 reverse  | 5' TGCAGCTCAGCGATTTCTT 3'       |
| c-Jun forward | 5' AATACGCTGCCAGTGTC A 3'       |
| c-Jun reverse | 5' TCTGCGGCTCTTCCTTCA 3'        |
| Jun-b forward | 5' ACTACAAACTCCTGAAACCCACC 3'   |
| Jun-b reverse | 5' CAAAGCCCTCCTGCTCCTC 3'       |
| Jun-d forward | 5' ACACGCAGGAACGCATCAA 3'       |
| Jun-d reverse | 5' AGGGCGAAATCGGACACTC 3'       |
| ATF1 forward  | 5' TGTCTGTTCCGACTCCCATCTATCA 3' |
| ATF1 reverse  | 5' CGGTTCTCCAGGCACTTCACATACT 3' |
| ATF2 forward  | 5' CACGGCAGTGGATTGGTTAGGG 3'    |
| ATF2 reverse  | 5' GCTGCTTGGCACGGAAAGGTC 3'     |
| ATF3 forward  | 5' CCTCCTGGGTCACTGGTA 3'        |
| ATF3 reverse  | 5' GCAGGCACTCTGTCTTCTC 3'       |
| ATF4 forward  | 5' TCAGAATGGCTGGCTATGGATGG 3'   |
| ATF4 reverse  | 5' GAACAGGGAAGAGGCTGCAAGAA 3'   |
| ATF5 forward  | 5' GCTTACCCTTGCCACCTTTGAT 3'    |
| ATF5 reverse  | 5' CTCTGGCTTCGTGCCTTATACACCT 3' |
| ATF6 forward  | 5' CCGAGAGTCTGCTTGTCAGTCACG 3'  |
| ATF6 reverse  | 5' GGGGCTGACATGGAGGTGGA 3'      |
| ATF6B forward | 5' GGAGCAGACGCAGTTGTTTCG 3'     |
| ATF6B reverse | 5' GGTGCCAGGGACTCCATCTTTAC 3'   |
| ATF7 forward  | 5' TGGAGGTTGTGGAATGGTGGTAG 3'   |
| ATF7 reverse  | 5' GCTCTGAGCTTTCCTTGGGACTT 3'   |
| Actin forward | 5' AGGACTCCTATGTGGGTGACGA 3'    |
| Actin reverse | 5' CGTTGCCAATAGTGATGACCTG 3'    |
